# Supplementary material
Source: HighWire-hosted journal article supplement (https://www.cmajopen.ca/highwire/filestream/87687/field_highwire_adjunct_files/3/2021-0223-4-at.pdf)
Supplement: 2021-0223-4-at.pdf [file 2021-0223-4-at.pdf]

Appendix Table 1: Covariates effects for adult household food Insecurity

| N=386                                                 | Caregiver distress score (0-10) |             |             |              |
|-------------------------------------------------------|---------------------------------|-------------|-------------|--------------|
|                                                       | Adjusted*                       |             |             |              |
|                                                       | Beta                            | 2.5% CI     | 97.5% CI    | p-value      |
| <b>Adult household FI score (0-10)</b>                | 0.21                            | <b>0.07</b> | <b>0.36</b> | <b>0.004</b> |
| Caregiver own health - fair                           | 1.43                            | 0.07        | 0.36        | <b>0.01</b>  |
| Caregiver own health - good                           | 0.43                            | 0.43        | 2.42        | 0.29         |
| Caregiver own health - poor                           | 1.70                            | -0.36       | 1.21        | 0.06         |
| Caregiver own health - very good                      | 0.08                            | -0.10       | 3.50        | 0.84         |
| Caregiver employment status – both not employed       | -0.18                           | -0.67       | 0.83        | 0.76         |
| Caregiver employment status – both part time          | -1.00                           | -1.39       | 1.02        | 0.32         |
| Caregiver employment status – one caregiver full time | 0.37                            | -2.97       | 0.96        | 0.29         |
| Caregiver employment status – other                   | 0.79                            | -0.32       | 1.07        | 0.09         |
| Single parent household - yes                         | 0.46                            | -0.11       | 1.68        | 0.27         |
| Number of children                                    | -0.33                           | -0.35       | 1.27        | <b>0.005</b> |
| Month of admission - May                              | 0.01                            | -0.87       | 0.88        | 0.99         |
| Month of admission - June                             | -0.12                           | -1.03       | 0.79        | 0.80         |
| Month of admission - July                             | -0.15                           | -1.12       | 0.81        | 0.75         |
| Month of admission - August                           | 0.48                            | -0.49       | 1.46        | 0.33         |
| Month of admission – September                        | 0.33                            | -0.64       | 1.30        | 0.51         |
| Months of admission- October                          | -0.43                           | -1.60       | 0.73        | 0.47         |
| Duration of admission                                 | 0.04                            | -0.64       | 1.30        | 0.05         |
| Child’s chronic condition                             | -0.03                           | 0.00        | 0.09        | 0.90         |
| Child age                                             | 0.00                            | -0.58       | 0.51        | 0.43         |
| Household income \$150,000+                           | 1.29                            | -0.01       | 0.00        | <b>0.01</b>  |
| Household income \$40,000 to \$79,999                 | 0.48                            | 0.30        | 2.27        | 0.25         |
| Household income \$80,000 to \$149,999                | 0.55                            | -0.34       | 1.29        | 0.22         |

\*Adjusted for caregiver’s own health, employment status, household income, single parent household, number of children, month of admission, child age, child’s chronic condition and duration of admission.<sup>21</sup>

**Appendix Table 2:** Covariates effects for child household food Insecurity

| N=386                                                 | Caregiver distress score (0-10) |         |          |             |
|-------------------------------------------------------|---------------------------------|---------|----------|-------------|
|                                                       | Adjusted*                       |         |          |             |
|                                                       | Beta                            | 2.5% CI | 97.5% CI | p-value     |
| <b>Child household FI score (0-8)</b>                 | 0.38                            | 0.10    | 0.66     | <b>0.01</b> |
| Caregiver own health - fair                           | 1.31                            | 0.30    | 2.32     | <b>0.01</b> |
| Caregiver own health - good                           | 0.45                            | -0.34   | 1.24     | 0.26        |
| Caregiver own health - poor                           | 1.71                            | -0.10   | 3.51     | 0.06        |
| Caregiver own health - very good                      | 0.03                            | -0.72   | 0.78     | 0.94        |
| Caregiver employment status – both not employed       | -0.16                           | -1.37   | 1.05     | 0.80        |
| Caregiver employment status – both part time          | -1.46                           | -3.51   | 0.58     | 0.16        |
| Caregiver employment status – one caregiver full time | 0.40                            | -0.29   | 1.10     | 0.25        |
| Caregiver employment status – other                   | 0.91                            | 0.02    | 1.81     | 0.04        |
| Single parent household - yes                         | 0.36                            | -0.47   | 1.19     | 0.39        |
| Number of children                                    | -0.32                           | -0.55   | -0.09    | <b>0.01</b> |
| Month of admission - May                              | 0.12                            | -0.76   | 1.01     | 0.79        |
| Month of admission - June                             | 0.01                            | -0.90   | 0.92     | 0.98        |
| Month of admission - July                             | -0.06                           | -1.03   | 0.91     | 0.90        |
| Month of admission - August                           | 0.60                            | -0.38   | 1.58     | 0.23        |
| Month of admission – September                        | 0.36                            | -0.61   | 1.34     | 0.46        |
| Months of admission- October                          | -0.41                           | -1.57   | 0.76     | 0.49        |
| Duration of admission                                 | 0.04                            | 0.00    | 0.09     | 0.06        |
| Child’s chronic condition                             | 0.03                            | -0.52   | 0.58     | 0.91        |
| Child age                                             | 0.00                            | -0.01   | 0.00     | 0.41        |
| Household income \$150,000+                           | 1.15                            | 0.17    | 2.12     | <b>0.02</b> |
| Household income \$40,000 to \$79,999                 | 0.40                            | -0.42   | 1.22     | 0.34        |
| Household income \$80,000 to \$149,999                | 0.41                            | -0.46   | 1.29     | 0.35        |

\*Adjusted for caregiver’s own health, employment status, household income, single parent household, number of children, month of admission, child age, child’s chronic condition and duration of admission.<sup>21</sup>

**Appendix Table 3:** Covariates effects for hospital-based food Insecurity

| N=386                                                 | Caregiver distress score (0-10) |         |          |                  |
|-------------------------------------------------------|---------------------------------|---------|----------|------------------|
|                                                       | Adjusted*                       |         |          |                  |
|                                                       | Beta                            | 2.5% CI | 97.5% CI | p-value          |
| <b>Hospital-based FI score (0-3)</b>                  | 0.56                            | 0.27    | 2.25     | <b>&lt;0.001</b> |
| Caregiver own health - fair                           | 1.26                            | -0.34   | 1.22     | <b>0.01</b>      |
| Caregiver own health - good                           | 0.44                            | -0.53   | 3.07     | 0.26             |
| Caregiver own health - poor                           | 1.27                            | -0.70   | 0.79     | 0.17             |
| Caregiver own health - very good                      | 0.05                            | -1.48   | 0.90     | 0.90             |
| Caregiver employment status – both not employed       | -0.29                           | -2.88   | 0.99     | 0.63             |
| Caregiver employment status – both part time          | -0.94                           | -0.40   | 0.97     | 0.34             |
| Caregiver employment status – one caregiver full time | 0.29                            | -0.22   | 1.56     | 0.41             |
| Caregiver employment status – other                   | 0.67                            | -0.42   | 1.19     | 0.14             |
| Single parent household - yes                         | 0.39                            | -0.57   | -0.11    | 0.35             |
| Number of children                                    | -0.34                           | -0.83   | 0.90     | <b>0.004</b>     |
| Month of admission - May                              | 0.04                            | -1.05   | 0.75     | 0.93             |
| Month of admission - June                             | -0.15                           | -1.15   | 0.75     | 0.74             |
| Month of admission - July                             | -0.20                           | -0.56   | 1.38     | 0.68             |
| Month of admission - August                           | 0.41                            | -0.67   | 1.25     | 0.40             |
| Month of admission – September                        | 0.29                            | -1.62   | 0.68     | 0.56             |
| Months of admission- October                          | -0.47                           | 0.00    | 0.08     | 0.43             |
| Duration of admission                                 | 0.04                            | -0.62   | 0.47     | 0.07             |
| Child’s chronic condition                             | -0.07                           | 0.00    | 0.00     | 0.79             |
| Child age                                             | 0.00                            | 0.28    | 2.20     | 0.74             |
| Household income \$150,000+                           | 1.24                            | -0.48   | 1.12     | <b>0.01</b>      |
| Household income \$40,000 to \$79,999                 | 0.32                            | -0.50   | 1.18     | 0.43             |
| Household income \$80,000 to \$149,999                | 0.34                            | 0.27    | 2.25     | 0.42             |

\*Adjusted for caregiver’s own health, employment status, household income, single parent household, number of children, month of admission, child age, child’s chronic condition and duration of admission.<sup>21</sup>
